# Supplementary material for: Nitrite accumulation in a denitrifying biocathode microbial fuel cell
Source: Royal Society of Chemistry journal article supplement (doi:10.1039/c5ew00260e), 2016-01-01
Supplement: c5ew00260e1.pdf [file c5ew00260e1.pdf]

SUPPLEMENTARY INFORMATION

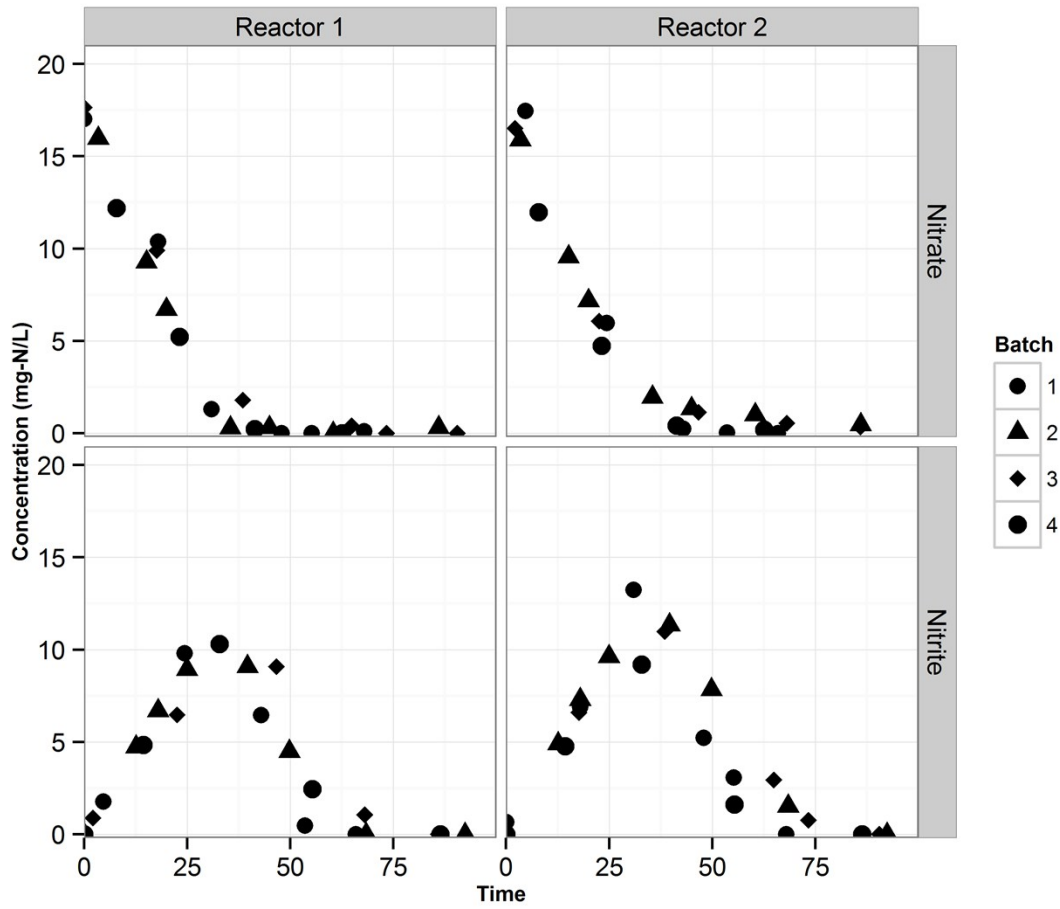

Figure S1: Batch Denitrification data during Steady State Operation for Reactor 1 and Reactor 2.

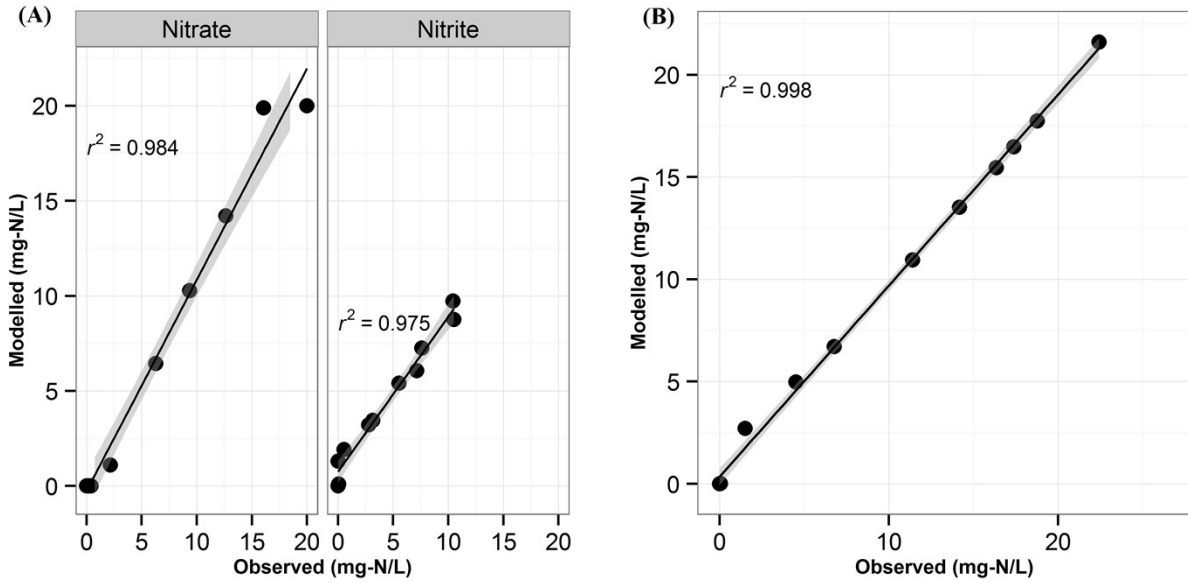

Figure S2: Modelled vs Observed Plots with  $R^2$  values for Calibration Datasets (A) Typical Batch- 20 mg  $\text{NO}_3\text{-N/L}$  (E2) (B) Nitrite-Only 30 mg  $\text{NO}_2\text{-N/L}$  (E3). The shaded areas represent confidence intervals for the trendline.

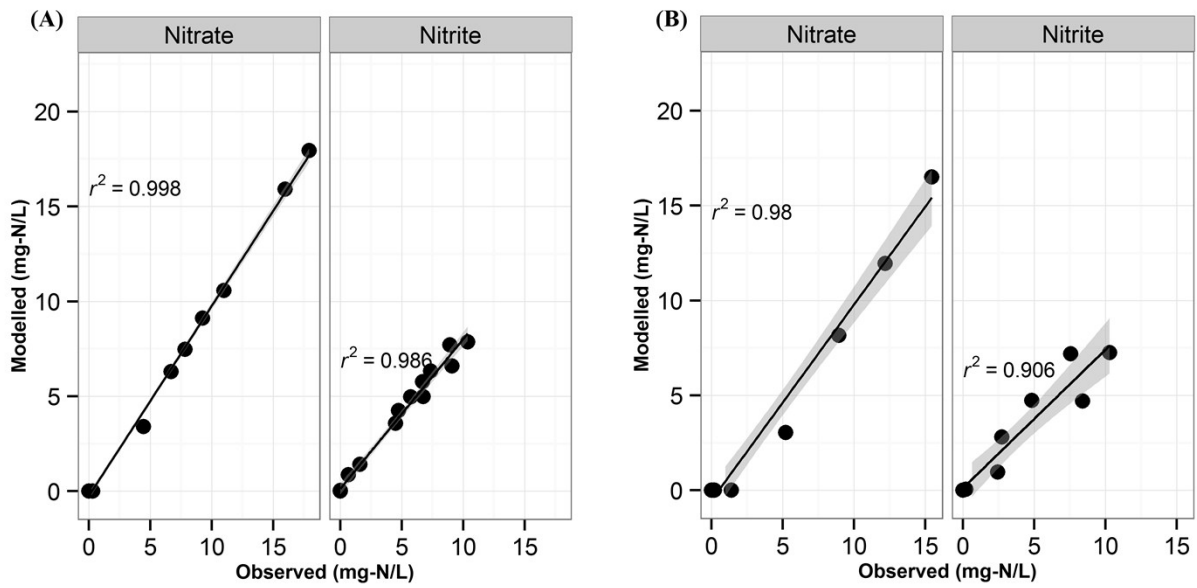

Figure S3: Modelled vs Observed Plots with  $R^2$  values for Validation Datasets (A) MFC Reactor-1 (b) MFC Reactor-2. The shaded areas represent confidence intervals for the trendline.

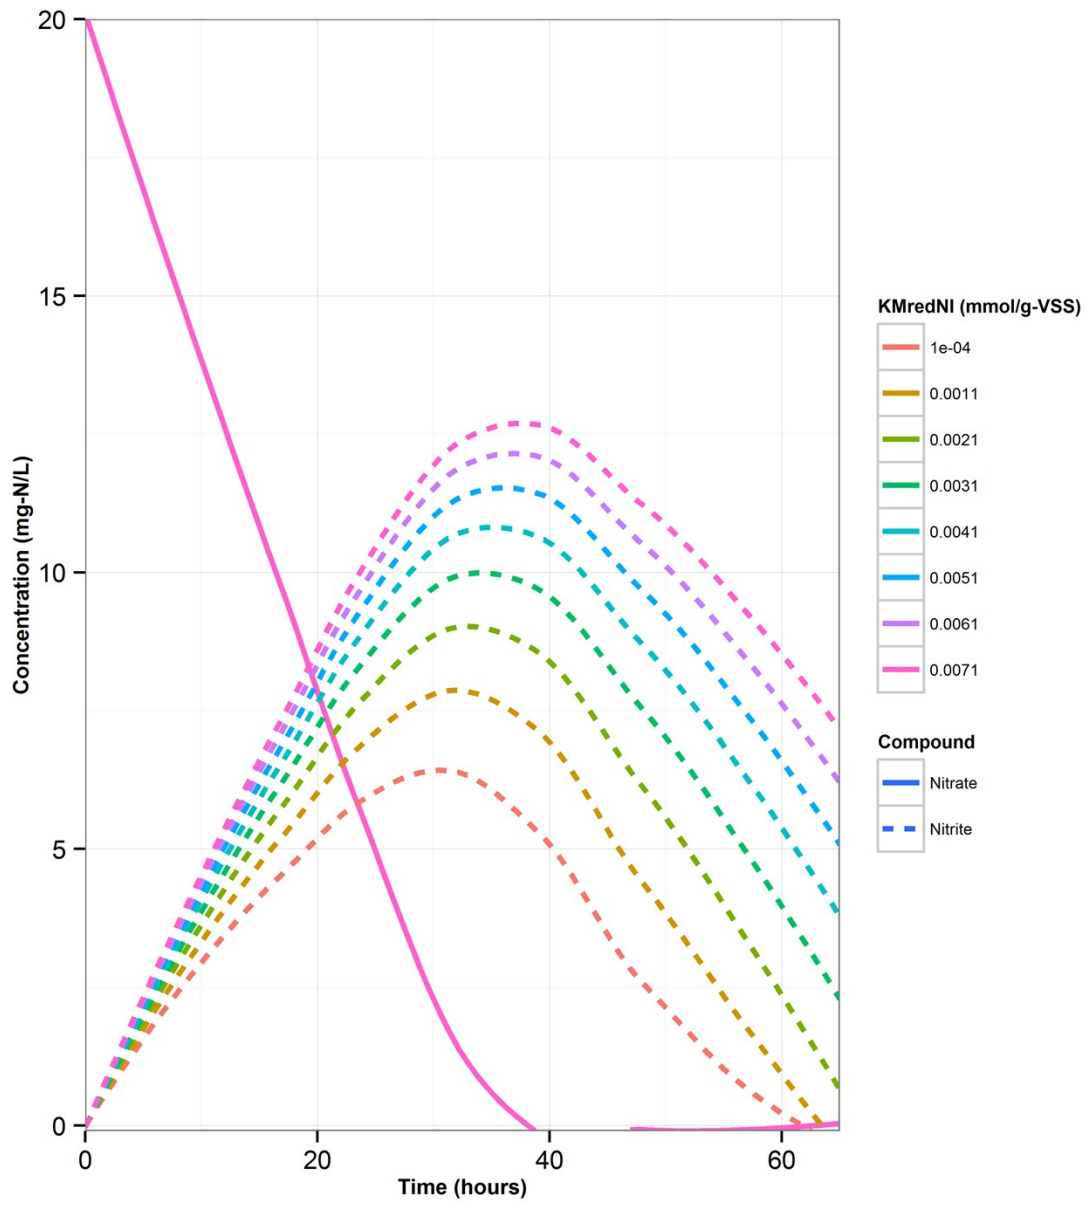

Figure S4: Sensitivity of the model to  $K_{MredNI}$

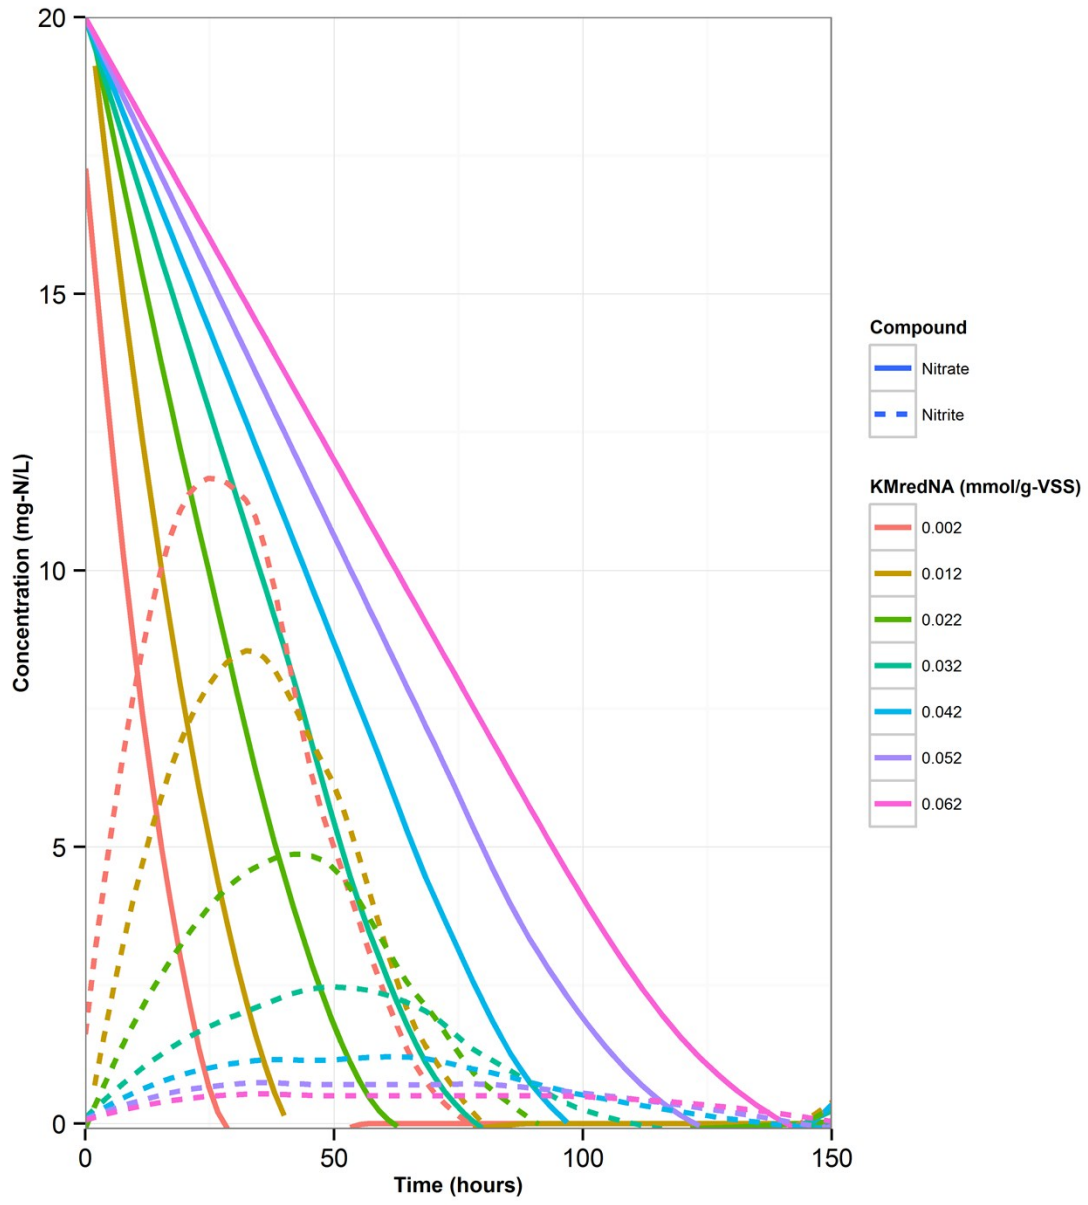

Figure S5: Sensitivity of the model to  $K_{mredNA}$
